# Supplementary material for: Positive selection of skeleton-related genes during duck domestication revealed by whole genome sequencing
Source: PubMed Central journal article supplement (PMC8419914; doi:10.1186/s12862-021-01894-7), 2021-09-06
Supplement: 12862_2021_1894_MOESM1_ESM.pdf [file 12862_2021_1894_MOESM1_ESM.pdf]

**A**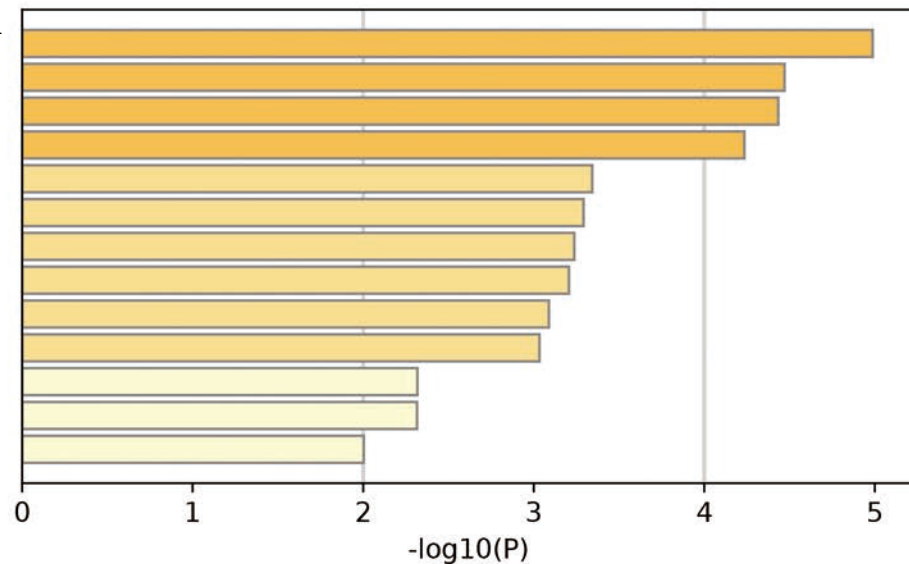

GO:0009581: detection of external stimulus  
GO:0035249: synaptic transmission, glutamatergic  
GO:0051216: cartilage development  
M12012: ST P38 MAPK PATHWAY  
GO:0007517: muscle organ development  
hsa04020: Calcium signaling pathway  
GO:0035418: protein localization to synapse  
GO:0071277: cellular response to calcium ion  
R-HSA-1474290: Collagen formation  
WP117: GPCRs, Other  
GO:0051345: positive regulation of hydrolase activity  
GO:0001701: in utero embryonic development  
GO:0055065: metal ion homeostasis

**B**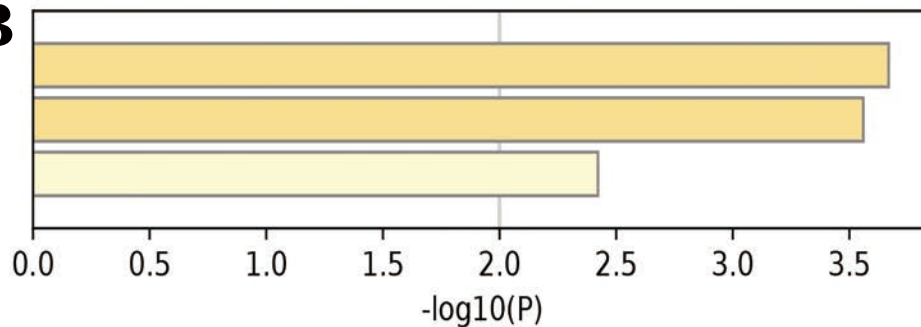

GO:0010817: regulation of hormone levels  
GO:0007601: visual perception  
GO:0007423: sensory organ development
